# Supplementary material for: The Interplay of Perceived Risks and Benefits in Deciding to Become Vaccinated against COVID-19 While Pregnant or Breastfeeding: A Cross-Sectional Study in Italy
Source: MDPI journal article supplement (doi:10.3390/jcm12103469), 2023-05-15
Supplement: s1 [file s1]

## Supplementary Material

The Interplay of Perceived Risks and Benefits in Deciding to Become Vaccinated against COVID-19 While Pregnant or Breastfeeding: A Cross-Sectional Study in Italy

### Tables

**Table S1.** Selection Criteria. Questionnaire completion of at least 85%, vaccination before pregnancy, and completeness of the analyzed variables.

| Variable, n (%)                | Overall,<br>N = 1,432 | C19 Vaccine Status                         |                                         |                                 |
|--------------------------------|-----------------------|--------------------------------------------|-----------------------------------------|---------------------------------|
|                                |                       | Not<br>vaccinated,<br>N = 725 <sup>1</sup> | Vaccinate<br>d,<br>N = 638 <sup>1</sup> | Missing,<br>N = 69 <sup>1</sup> |
| Completion <85%                | 251 (18%)             | 112 (15%)                                  | 70 (11%)                                | 69 (100%)                       |
| Vaccinated before<br>pregnancy | 65 (4.5%)             | 0 (0%)                                     | 65 (10%)                                | 0 (0%)                          |
| Missing values                 | 278 (19%)             | 133 (18%)                                  | 76 (12%)                                | 69 (100%)                       |
| Questionnaires included        | 1,104<br>(77%)        | 592 (82%)                                  | 512 (80%)                               | 0 (0%)                          |

**Table S2.** Main characteristics by Mother Status.

| Variable                   | Mother Status                      |                                        |                                    | <i>P</i> -value <sup>2</sup> |
|----------------------------|------------------------------------|----------------------------------------|------------------------------------|------------------------------|
|                            | Overall,<br>N = 1,104 <sup>1</sup> | Breastfeeding,<br>N = 572 <sup>1</sup> | Pregnancy,<br>N = 532 <sup>1</sup> |                              |
| <b>Age (years)</b>         | 34.0 (31.0, 37.0)                  | 35.0 (32.0, 38.0)                      | 34.0 (31.0, 37.0)                  | <0.001                       |
| <b>Education</b>           |                                    |                                        |                                    | <0.001                       |
| Middle school              | 25 (2.3%)                          | 10 (1.7%)                              | 15 (2.8%)                          |                              |
| High school                | 318 (29%)                          | 136 (24%)                              | 182 (34%)                          |                              |
| University degree          | 581 (53%)                          | 319 (56%)                              | 262 (49%)                          |                              |
| Higher level degree        | 180 (16%)                          | 107 (19%)                              | 73 (14%)                           |                              |
| <b>Employment</b>          |                                    |                                        |                                    | 0.167                        |
| Private or public employee | 735 (67%)                          | 366 (64%)                              | 369 (69%)                          |                              |
| Unemployed or Other        | 182 (16%)                          | 102 (18%)                              | 80 (15%)                           |                              |
| Self-employed              | 187 (17%)                          | 104 (18%)                              | 83 (16%)                           |                              |
| <b>Other Children</b>      |                                    |                                        |                                    | <0.001                       |
| No                         | 476 (43%)                          | 221 (39%)                              | 255 (48%)                          |                              |
| 1                          | 481 (44%)                          | 255 (45%)                              | 226 (42%)                          |                              |
| 2+                         | 147 (13%)                          | 96 (17%)                               | 51 (9.6%)                          |                              |
| <b>C19 Risk Perception</b> | 0.19 (-0.58, 0.70)                 | 0.23 (-0.45, 0.72)                     | 0.13 (-0.71, 0.70)                 | 0.065                        |
| <b>Pandemic Fatigue</b>    | 0.04 (-0.62, 0.64)                 | 0.07 (-0.57, 0.62)                     | -0.02 (-0.64, 0.69)                | 0.536                        |

|                         |                        |                        |                        |        |
|-------------------------|------------------------|------------------------|------------------------|--------|
| <b>Pro-vax Attitude</b> | 0.17 (-0.75,<br>0.74)  | 0.21 (-0.45,<br>0.74)  | 0.07 (-0.68,<br>0.72)  | 0.061  |
| <b>C19 Conspiracy</b>   | -0.30 (-0.79,<br>0.66) | -0.40 (-0.84,<br>0.38) | -0.09 (-0.72,<br>0.80) | <0.001 |

---

<sup>1</sup> Median (IQR) or Frequency (%)

<sup>2</sup> Wilcoxon rank sum test; Pearson's Chi-squared test

---

**Table S3.** Main characteristics of not vaccinated mothers by Mother Status.

| Variable                                     | Overall,<br>N = 592 <sup>1</sup> | Mother Status                          |                                    | P-<br>value <sup>2</sup> |
|----------------------------------------------|----------------------------------|----------------------------------------|------------------------------------|--------------------------|
|                                              |                                  | Breastfeeding,<br>N = 188 <sup>1</sup> | Pregnancy,<br>N = 404 <sup>1</sup> |                          |
| <b>WTV in current status</b>                 | 10 (0, 51)                       | 20 (0, 70)                             | 10 (0, 50)                         | 0.117                    |
| <b>WTV if not<br/>breastfeeding/pregnant</b> | 94 (30,<br>100)                  | 73 (10, 100)                           | 100 (50, 100)                      | <0.001                   |
| <b>Age (years)</b>                           | 34.0 (31.0,<br>37.0)             | 35.0 (31.8,<br>38.0)                   | 34.0 (30.0,<br>37.0)               | 0.010                    |
| <b>Education</b>                             |                                  |                                        |                                    | 0.333                    |
| Middle school                                | 15 (2.5%)                        | 4 (2.1%)                               | 11 (2.7%)                          |                          |
| High school                                  | 212 (36%)                        | 59 (31%)                               | 153 (38%)                          |                          |
| University degree                            | 289 (49%)                        | 96 (51%)                               | 193 (48%)                          |                          |
| Higher level degree                          | 76 (13%)                         | 29 (15%)                               | 47 (12%)                           |                          |
| <b>Employment</b>                            |                                  |                                        |                                    | 0.038                    |
| Private or public employee                   | 392 (66%)                        | 112 (60%)                              | 280 (69%)                          |                          |
| Unemployed or Other                          | 104 (18%)                        | 43 (23%)                               | 61 (15%)                           |                          |
| Self-employed                                | 96 (16%)                         | 33 (18%)                               | 63 (16%)                           |                          |
| <b>Other Children</b>                        |                                  |                                        |                                    | <0.001                   |
| No                                           | 266 (45%)                        | 67 (36%)                               | 199 (49%)                          |                          |
| 1                                            | 244 (41%)                        | 80 (43%)                               | 164 (41%)                          |                          |
| 2+                                           | 82 (14%)                         | 41 (22%)                               | 41 (10%)                           |                          |
| <b>C19 Risk Perception</b>                   | -0.19 (-<br>1.09, 0.58)          | -0.45 (-1.34,<br>0.35)                 | -0.09 (-0.82,<br>0.65)             | 0.002                    |
| <b>Pandemic Fatigue</b>                      | 0.21 (-                          | 0.43 (-0.23,                           | 0.11 (-0.62,                       | 0.004                    |

|                         |             |               |               |        |
|-------------------------|-------------|---------------|---------------|--------|
|                         | 0.50, 0.79) | 0.93)         | 0.74)         |        |
| <b>Pro-vax Attitude</b> | -0.25 (-    | -0.48 (-1.24, | -0.16 (-0.87, | <0.001 |
|                         | 0.96, 0.47) | 0.20)         | 0.54)         |        |
| <b>C19 Conspiracy</b>   | 0.51 (-     | 0.86 (0.06,   | 0.33 (-0.46,  | <0.001 |
|                         | 0.36, 1.26) | 1.40)         | 1.16)         |        |

<sup>1</sup> Median (IQR) or Frequency (%)

<sup>2</sup> Wilcoxon rank sum test; Pearson's Chi-squared test

**Table S4.** C19 vaccine perception of Risks and Benefits for baby and mother by Mother Status.

|                                  |                        | Mother Status |                           | <i>P</i> -value <sup>2</sup> |
|----------------------------------|------------------------|---------------|---------------------------|------------------------------|
|                                  |                        | Overall,      | Breastfeeding, Pregnancy, |                              |
| <b>C19 vaccine perception of</b> | N = 1,104 <sup>1</sup> | N = 572       | N = 532 <sup>1</sup>      |                              |
| Risks for baby                   | 3 (2, 4)               | 3 (2, 4)      | 4 (2, 5)                  | <0.001                       |
| Risks for mother                 | 3 (2, 4)               | 3 (2, 4)      | 3 (2, 4)                  | 0.020                        |
| Benefits for baby                | 4 (3, 5)               | 4 (3, 5)      | 4 (3, 4.25)               | <0.001                       |
| Benefits for mother              | 4 (3, 5)               | 5 (4, 5)      | 4 (3, 5)                  | <0.001                       |

<sup>1</sup> Median (IQR) or Frequency (%)

<sup>2</sup> Wilcoxon rank sum test

**Table S5.** Dimensionality reduction - factor analyses.

|                                       | <b>COVID-19<br/>perceived risk</b> | <b>Pandemic<br/>fatigue<br/>scale</b> | <b>Vaccine<br/>perception</b> | <b>COVID-19<br/>conspiracy</b> |
|---------------------------------------|------------------------------------|---------------------------------------|-------------------------------|--------------------------------|
| <b>Num. of items</b>                  | 4                                  | 6                                     | 8                             | 7                              |
| <b>Cronbach's <math>\alpha</math></b> | 0.85                               | 0.79                                  | 0.88                          | 0.85                           |
| <b>Item 1</b>                         | Scariness                          | Pfs 1                                 | Vax<br>perception 1           | C-19 Conspiracy<br>1           |
| <b>Item 2</b>                         | Severity                           | Pfs 2                                 | Vax<br>perception 2           | C-19 Conspiracy<br>2           |
| <b>Item 3</b>                         | Contagiousness                     | Pfs 3                                 | Vax<br>perception 3           | C-19 Conspiracy<br>3           |
| <b>Item 4</b>                         | Mutation                           | Pfs 4                                 | Vax<br>perception 4           | C-19 Conspiracy<br>4           |
| <b>Item 5</b>                         |                                    | Pfs 5                                 | Vax<br>perception 5           | C-19 Conspiracy<br>5_rev       |
| <b>Item6</b>                          |                                    | Pfs 6                                 | Vax<br>perception 6           | C-19 Conspiracy<br>6_rev       |
| <b>Item7</b>                          |                                    |                                       | Vax<br>perception 7           | C-19 Conspiracy<br>7_rev       |
| <b>Item 8</b>                         |                                    |                                       | Vax                           |                                |

| perception 8                            |             |             |             |             |
|-----------------------------------------|-------------|-------------|-------------|-------------|
| <b>Load. item 1</b>                     | 0.89        | 0.64        | 0.70        | 0.96        |
| <b>Load. item 2</b>                     | 0.83        | 0.79        | 0.75        | 0.46        |
| <b>Load. item 3</b>                     | 0.53        | 0.71        | 0.84        | 0.63        |
| <b>Load. item 4</b>                     | 0.84        | 0.56        | 0.71        | 0.79        |
| <b>Load. item 5</b>                     |             | 0.51        | 0.56        | 0.82        |
| <b>Load. item 6</b>                     |             | 0.52        | 0.67        | 0.80        |
| <b>Load. item 7</b>                     |             |             | 0.75        | 0.65        |
| <b>Load. item 8</b>                     |             |             | 0.74        |             |
| <b>SS loadings</b>                      | <b>2.46</b> | <b>2.39</b> | <b>4.11</b> | <b>3.43</b> |
| <b>Proportion of<br/>var. explained</b> | <b>0.61</b> | <b>0.40</b> | <b>0.51</b> | <b>0.49</b> |



## Figures

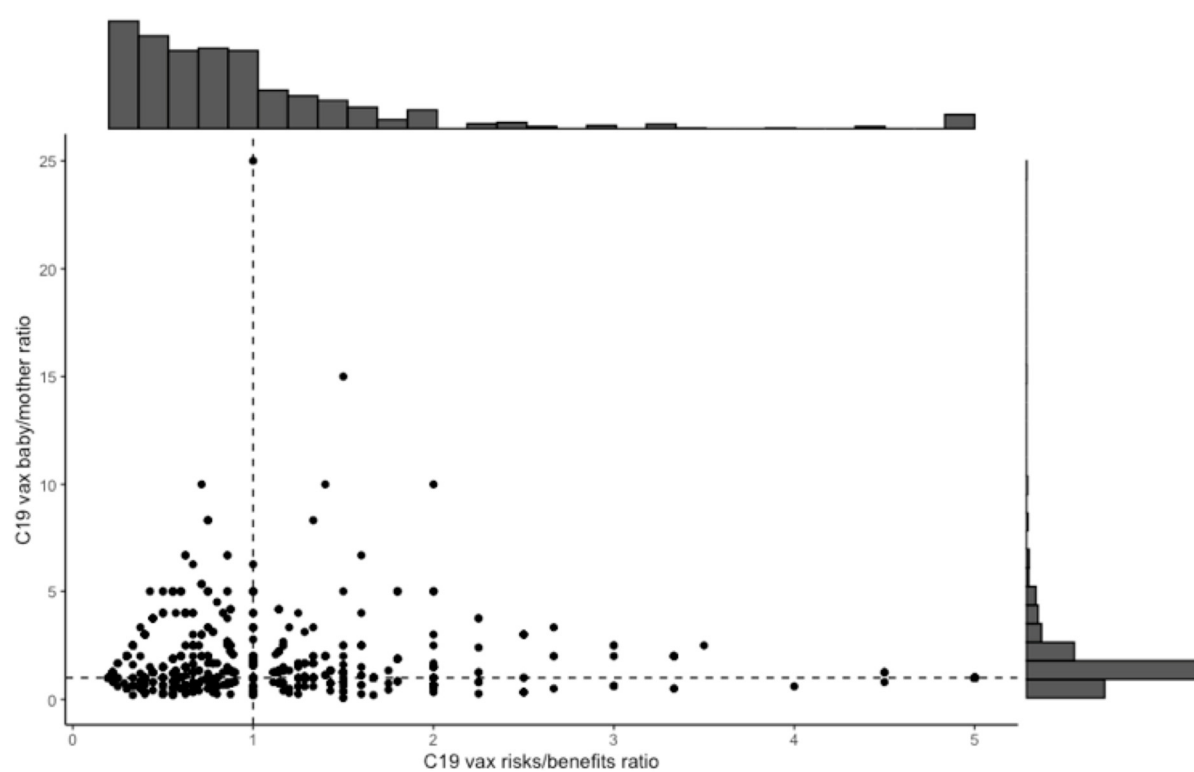

**Figure S1.** Joint and marginal distribution of the scores for C19 vax risks/benefits ratio and C19 vax baby/mother ratio. With the dotted lines the ratios equal to the unity.
